# Supplementary material for: Representations en variables d'etat de modeles de guides d'ondes avec derivation fractionnaire
Source: Royal Society of Chemistry journal article supplement (doi:10.1039/c5sm01062d), 1994-01-01
Supplement: c5sm01062d1.pdf [file c5sm01062d1.pdf]

## Supporting information

### HTP measurement of Chol6Azo

N\*LC composed of 6.7 mg Chol6Azo and 101.3 mg E7 (mole ratio: 1/100) was used to measure the HTP of Chol6Azo. A wedge LC cell was made as previous work<sup>1,2</sup> and illustrated in Fig S1a. The POM observation of the parallel disclination lines is shown in Fig S1b and the distance  $R$  between the two parallel disclination line could be calculated ( $R=562\mu\text{m}$ ,  $439\mu\text{m}$ ,  $433\mu\text{m}$  in Fig S1b). Combining related equations in Fig S1c, the HTP of Chol6Azo could be calculated ( $\text{HTP}=6.7\mu\text{m}^{-1}$ ,  $8.5\mu\text{m}^{-1}$ ,  $8.6\mu\text{m}^{-1}$ ). Besides, under a long time (5 minutes) UV irradiation lower than  $15.0\text{ mW cm}^{-2}$ , the *trans*-Chol6Azo isomerized to the *cis*-Chol6Azo, the disclination lines moved to the thinner region and  $R$  was unchanged, so the HTP of the *cis*-Chol6Azo is nearly the same with the *trans*-Chol6Azo. With a strong UV irradiation more than  $20.0\text{ mW cm}^{-2}$ , the disclination lines were covered with LC textures in seconds and the N\*LC was disrupted into an isotropic phase. The HTP values<sup>3</sup> of the two chiral dopants are listed in Table S1.

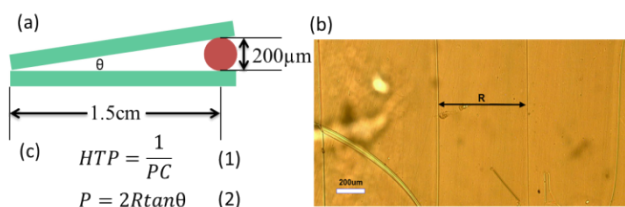

**Fig. S1** HTP measurement of Chol0Azo in a N\*LC (Chol6Azo and E7 at a mole ration of 1/100) (a) Schematic illustration of a wedge cell. (b) POM observation of the N\*LC disclination lines. (c) Equations<sup>4</sup> to calculate HTP of Chol6Azo.

**Table S1** The corresponding BP temperature range of the liquid crystalline composites prepared by doping Chol0Azo or Chol2Azo into N\*LC.

| Chiral Dopant          | HTP ( $\mu\text{m}^{-1}$ ) |
|------------------------|----------------------------|
| S811                   | 11.0                       |
| <i>trans</i> -Chol6Azo | 6.7~8.6                    |
| <i>cis</i> -Chol6Azo   | 6.7~8.6                    |

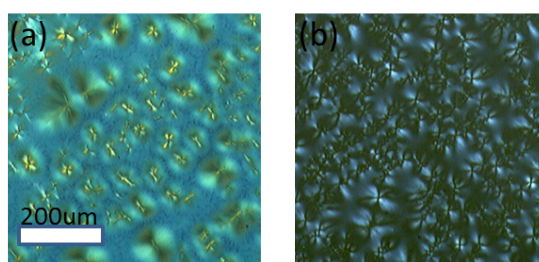

**Fig. S2** Typical POM textures for two samples (a) sample A3 (60.7 wt% E7, 35.3 wt% S811 and 4.0 wt% Chol0Azo) at  $29.3\text{ }^{\circ}\text{C}$ . (b) sample C3 (60.7 wt% E7, 35.3 wt% S811 and 4.0 wt% Chol2Azo) at  $33.1\text{ }^{\circ}\text{C}$ , the cooling rate is  $0.1\text{ }^{\circ}\text{C min}^{-1}$ .

**Table S2** The corresponding BP temperature range of the liquid crystalline composites prepared by doping Chol0Azo or Chol2Azo into N\*LC.

| Sample | Chol0Azo (wt%) | Chol2Azo (wt%) | $T_{\text{ISO-BP}} (^{\circ}\text{C})$ | $T_{\text{BP-N*}} (^{\circ}\text{C})$ | Temperature Range ( $^{\circ}\text{C}$ ) |
|--------|----------------|----------------|----------------------------------------|---------------------------------------|------------------------------------------|
| A1     | 1.0            | —              | 23.7                                   | 22.6                                  | 1.1                                      |
| A2     | 2.0            | —              | —                                      | —                                     | —                                        |
| A3     | 4.0            | —              | —                                      | —                                     | —                                        |
| C1     | —              | 1.0            | 28.9                                   | 27.6                                  | 1.3                                      |
| C2     | —              | 2.0            | —                                      | —                                     | —                                        |
| C3     | —              | 4.0            | —                                      | —                                     | —                                        |

$T_{\text{ISO-BP}}$ : phase transition temperature from isotropic phase to BPs.  $T_{\text{BP-N*}}$ : phase transition temperature from BPs to N\*LC.

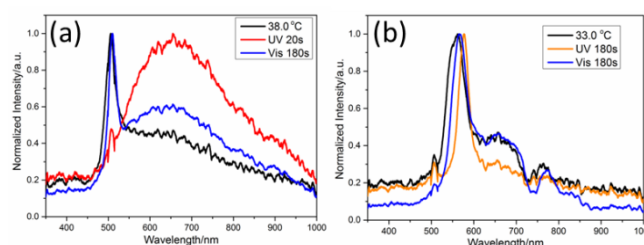

**Fig. S3** Reflection spectra of sample B3 under UV and white light irradiation at two temperatures (a)  $38.0\text{ }^{\circ}\text{C}$ , (b)  $33.0\text{ }^{\circ}\text{C}$ .

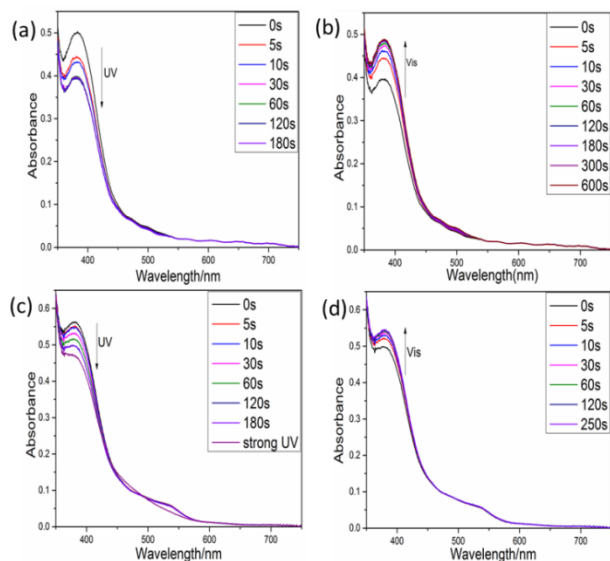

**Fig. S4** UV-Vis absorption spectra of the sample B3: irradiating of the sample with (a) UV light and (b) white light at 38.0 °C, irradiating of the sample with (c) UV light and (d) white light at 33.0 °C.

## References

- 1 R. Cano, *Bull. Soc. Fr. Mineral. Cristallogr.*, 1968, **91**, 20.
- 2 Yannian Li, Mengfei Wang, Augustine Urbas and Quan Li, *J. Mater. Chem. C*, 2013, **1**, 3917-3923.
- 3 Shih-Wei Ko, Shu-Hao Huang, Andy Y.-G. Fuh, Tsung-Hsien Lin, *Proc. SPIE*, 2009, **7414**, 741400.
- 4 P. de Gennes, J. Prost. *The Physics of Liquid Crystals*. Oxford Science Publications, Oxford (1993).
